# Supplementary material
Source: HighWire-hosted journal article supplement (https://pharmrev.aspetjournals.org/content/suppl/2014/01/06/66.1.222)
Supplement: Heger_-_Table_S3_-_9._Urinary_system.pdf [file Heger_-_Table_S3_-_9._Urinary_system.pdf]

**Table S3 - Urinary system**

Excel file available upon request to Michal Heger

**NOTE: cell lines that are listed as being contaminated (see [http://www.hpacultures.org.uk/media/EDA/AB/Cross\\_Contaminations\\_v6\\_7.pdf](http://www.hpacultures.org.uk/media/EDA/AB/Cross_Contaminations_v6_7.pdf)) are indicated in red bold italic font.**

|                | IC <sub>50</sub> or LC <sub>50</sub> [µM] | Incubation time [h] | Cell line      | Origin                     | Reference |
|----------------|-------------------------------------------|---------------------|----------------|----------------------------|-----------|
| <b>KIDNEY</b>  | 12.16±0.31                                | 48                  | TK-10          | Human renal cell cancer    | 174       |
|                | ±7                                        | 96                  | ACHN           | Human renal adenocarcinoma | 23        |
| <b>BLADDER</b> | ±10                                       | 24                  | RT4V6          | Human bladder cancer       | 141       |
|                | 10<IC50<25                                | 24                  | KU-7           | Human bladder cancer       | 141       |
|                | 16.5                                      | 24                  | EJ             | Human bladder cancer       | 155       |
|                | 10<IC50<20                                | 48                  | T24            | Human bladder cancer       | 128       |
|                | 10<IC50<20                                | 48                  | <b>UM-UC-2</b> | Human bladder cancer       | 128       |
|                | 0<IC50<10                                 | 48                  | EJ             | Human bladder cancer       | 128       |
|                | 3.5±1.3                                   | 48                  | RT4            | Human bladder cancer       | 138       |
|                | 10.5±1                                    | 48                  | 5637           | Human bladder cancer       | 138       |
|                | 20.5±1.1                                  | 48                  | J82            | Human bladder cancer       | 138       |
|                | 18.3±1.1                                  | 48                  | TCCSup         | Human bladder cancer       | 138       |

*Actual cell type: T-24 (human bladder carcinoma)*
